# Supplementary material
Source: publisher site journal article supplement (https://www.dovepress.com/article/supplementary_file/602726/602726%20Revised%20Supplementary%20File-.xlsx)
Supplement: Supplementary file 1 [file 602726%20Revised%20Supplementary%20File-.xlsx]

## Sheet: Sheet1
SUPPLEMENTARY FILE 1
Supplementary Table 1: Participants per ward per Health Facility
Ward:	RHH-E	RRH-N	RRH-W	Total
Pedeatric	112	33	43	188
Obsgyn	72	6	81	159
Surgical	52	79	57	188
Medical	35	57	43	135
Casualty	0	63	0	63
Other	0	16	4	20
Total	271	254	228	753
Supplementary Table 2: Nature of admission per Health Facility
Nature of admission	RHH-E	RRH-N	RRH-W	Total
First admission	195	171	147	513
Readmission	56	57	21	134
Referred	20	26	60	106
Total	271	254	228	753
Supplementary Table 3: Sex of Participant per Health Facility
Sex of Participant	RHH-E	RRH-N	RRH-W	Total
male	116	154	96	366
female	155	100	132	387
Total	271	254	228	753
Supplementary Table 4: Pregnancy status of female participants per Health Facility
Pregnant	RHH-E	RRH-N	RRH-W	Total
No	88	95	56	239
Yes	67	5	76	148
Total	155	100	132	387
Supplementary Table 5: Number of patients with a history of receiving antibiotics before admission per Health Facility
Patient received antibiotic before admission	RHH-E	RRH-N	RRH-W	Total
No	230	233	182	645
Yes	41	21	46	108
Total	271	254	228	753
Supplementary Table 6: Prescriber Category per Health Facility
Qualification of prescriber:	RHH-E	RRH-N	RRH-W	Total
Intern	120	66	185	371
medical officer	105	135	41	281
specialist	17	50	0	67
clinical officer	23	0	1	24
others	6	3	1	10
Total	271	254	228	753
Supplementary Table 7: Dose of Ceftriaxone prescribed per Health Facility
Dose of Ceftriaxone	RHH-E	RRH-N	RRH-W	Total
250mg	1	2	3	6
500mg	10	6	12	28
750mg	3	0	1	4
1000mg	69	34	17	120
1500mg	26	7	4	37
2000mg	155	173	167	495
100mg	0	3	0	3
others	7	29	24	60
Total	271	254	228	753
Supplementary Table 8: Ceftriaxone dosing frequency prescribed per Health Facility
Ceftriaxone dose frequency	RHH-E	RRH-N	RRH-W	Total
once daily	269	243	224	736
twice daily	2	11	2	15
not specified	0	0	2	2
Total	271	254	228	753
Supplementary Table 9: Ceftriaxone dosing duration prescribed per Health Facility
Ceftriaxone dosing duration	RHH-E	RRH-N	RRH-W	Total
not given	1	0	3	4
1day	0	2	2	4
2days	2	4	18	24
3days	97	52	129	278
4days	4	1	3	8
5days	158	173	68	399
7days	9	15	5	29
>7days	0	7	0	7
Total	271	254	228	753
Supplementary Table 10: Appropriateness of dose prescribed per Health Facility
Appropriate dose	RHH-E	RRH-N	RRH-W	Total
no	36 (13.28)	18 (7.09)	18 (7.89)	72(9.56)
yes	235 (86.72)	236(92.91)	210(92.11)	681(90.44)
Total	271	254	228	753
Supplementary Table 11: Appropriateness of dosing frequency precribed per Health Facility
Appropriate frequency	RHH-E	RRH-N	RRH-W	Total
no	36 (13.28)	18(7.09)	18(7.89)	72 (9.56)
yes	235(86.72)	236(92.91)	210(92.11)	681
Total	271(100)	254(100)	288(100)	753
Supplementary Table 12: Appropriateness of Ceftriaxone dosing duration prescribed per Health Facility
Appropriate duration	RHH-E	RRH-N	RRH-W	Total
no	41 (15.13)	22(8.66)	22(9.65)	85(11.29)
yes	230 (84.87)	232(91.34)	206(90.35)	668(88.71)
Total	271(100)	254(100)	228(100)	753
Supplementary Table 13: Appropriateness of drug combination with Cefriaxone prescribed per Health Facility
Appropriateness of combination	RHH-E	RRH-N	RRH-W	Total
no	108 (39.85)	42(16.54)	72(31.58)	222(29.48)
yes	163(60.15)	212(83.46)	156(68.42)	531(70.52)
Total	271(100)	254(100)	228(100)	753(100)
Supplementary Table 14: Overall Appropriateness of Ceftriaxone Prescription per Health Facility
Appropriate Prescription	RHH-E	RRH-N	RRH-W	Total
no	112 (41.33)	49(19.29)	76(33.33)	237(31.47)
yes	159(58.67)	205(80.71)	152(66.67)	516(68.53)
Total	271(100)	254(100)	228(100)	753(100)
